# Supplementary figures and images for: PPP1R15A-mediated dephosphorylation of eIF2α is unaffected by Sephin1 or Guanabenz
Source: eLife journal article supplement (doi:10.7554/elife.26109), 2017-04-27

# FIGURE 8 SUPPLEMENT

## A Mouse PPP1R15A

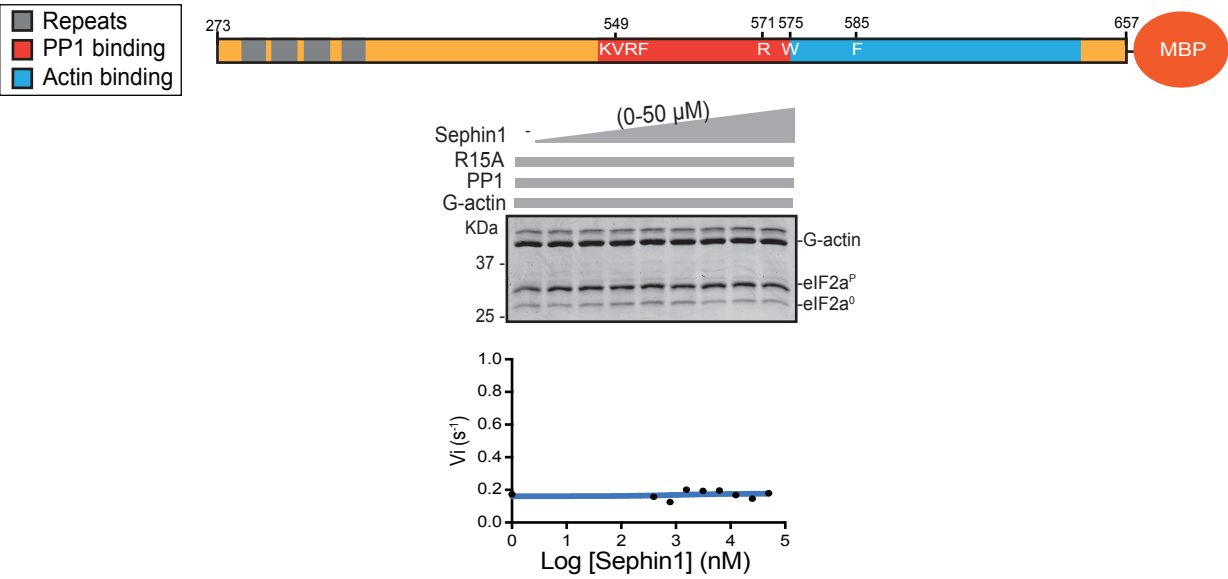

## B

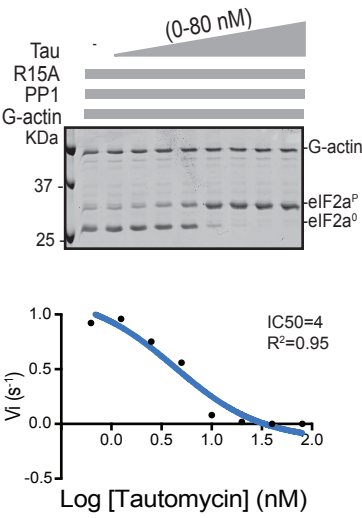

Supplement: supp [file elife-26109-supp-v1.zip]

FIGURE 10 supplement

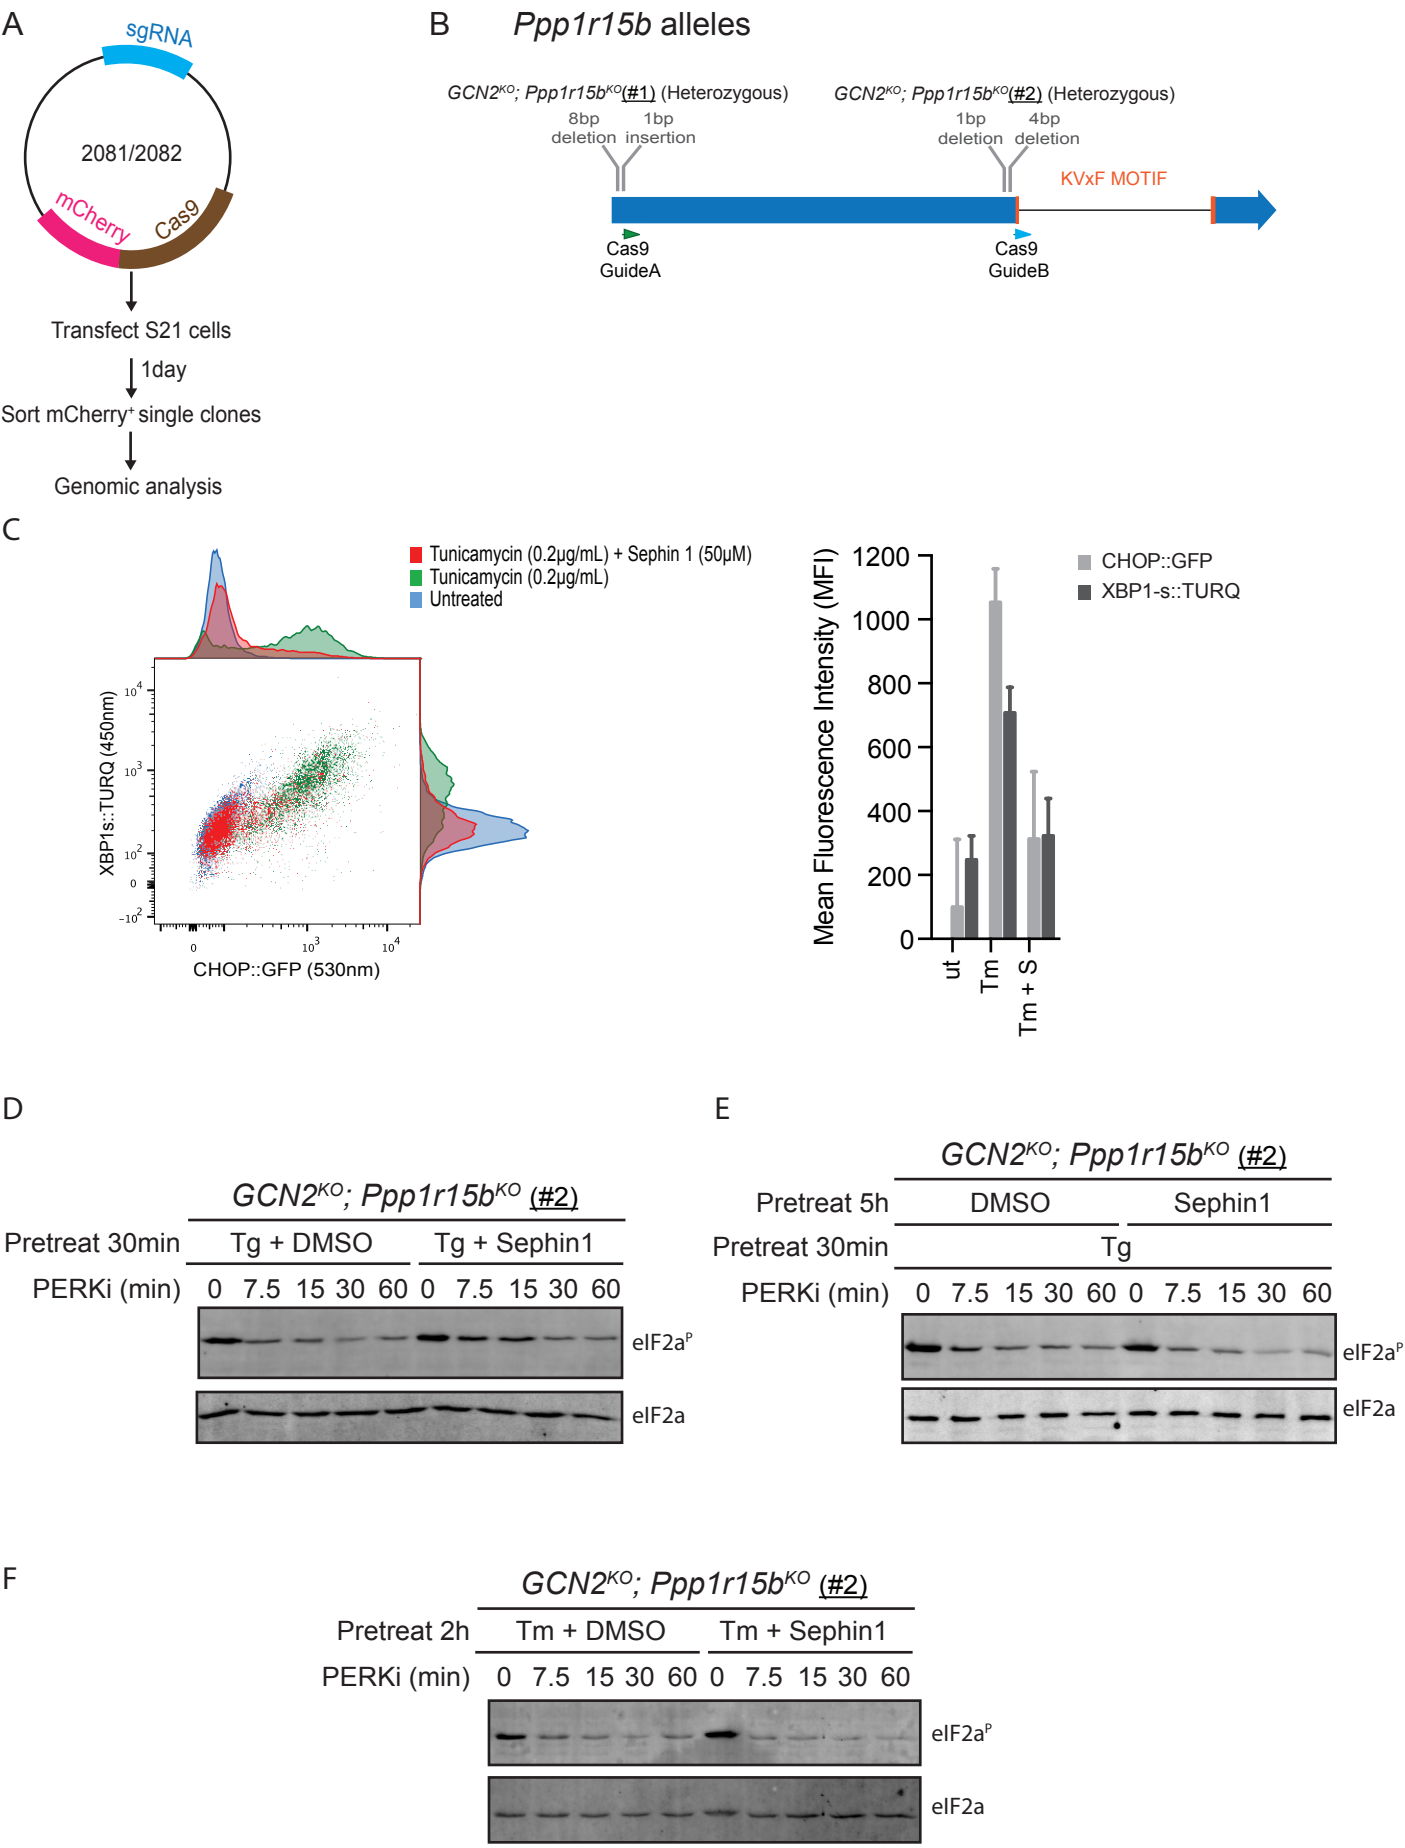

Supplement: supp [file elife-26109-supp-v1.zip]

FIGURE 9 supplement

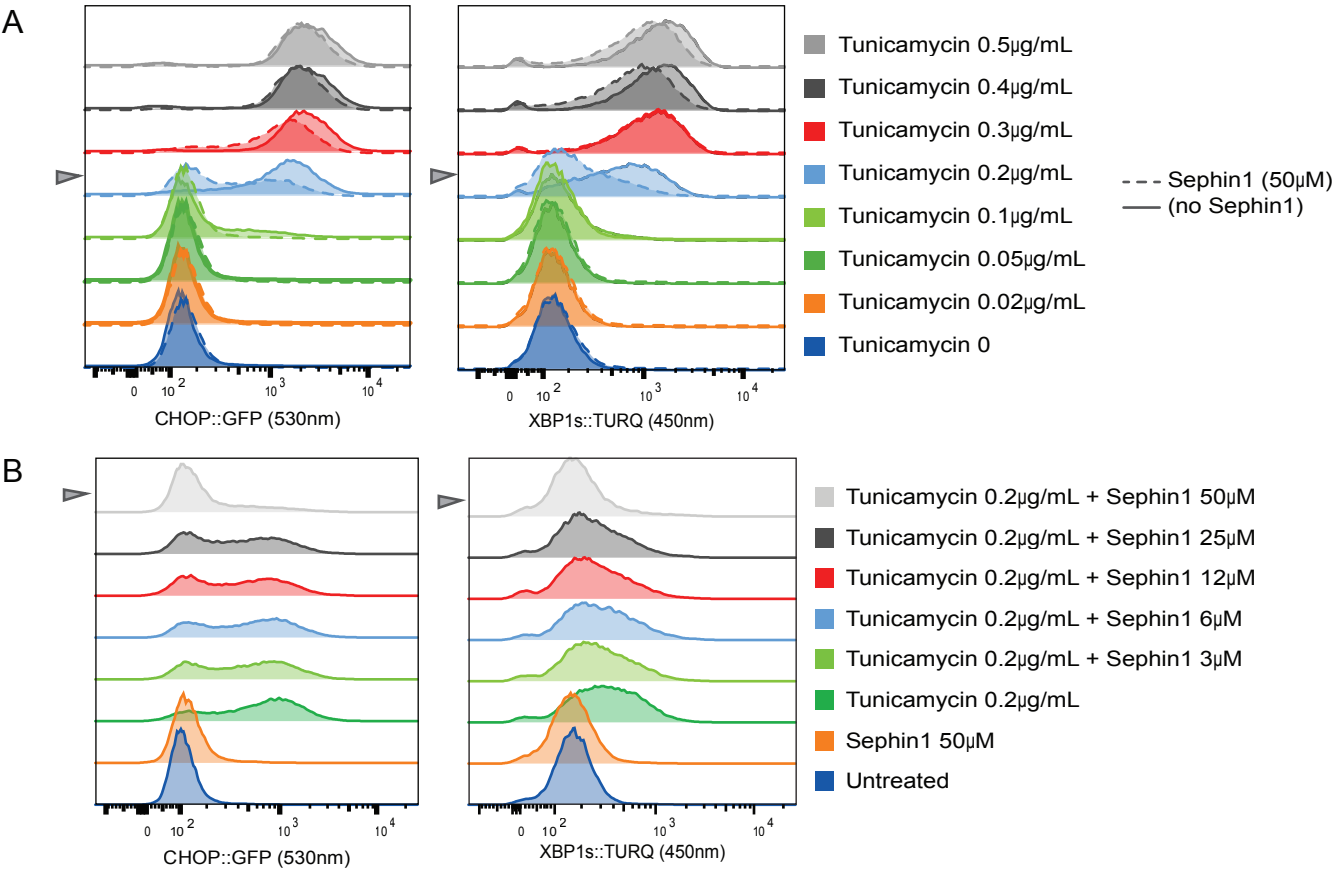

Supplement: supp [file elife-26109-supp-v1.zip]

FIGURE 11 Supplement

A

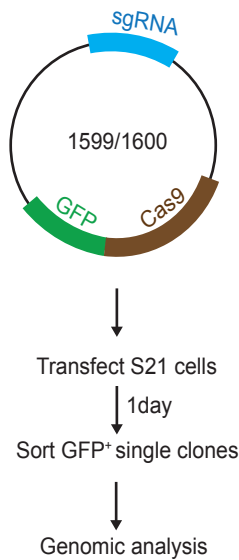

B *Ppp1r15a* alleles

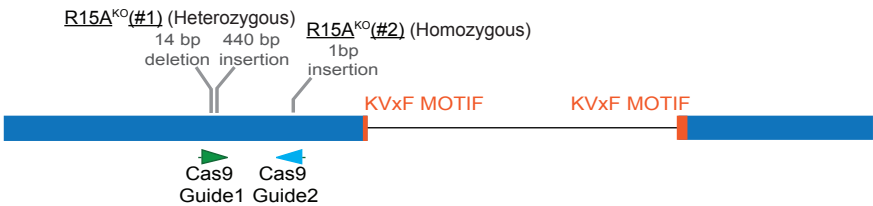

Supplement: supp [file elife-26109-supp-v1.zip]
